## COMMENTARY

# Emerging roles of protocadherins: from self-avoidance to enhancement of motility

Shuichi Hayashi\* and Masatoshi Takeichi\*

## ABSTRACT

Protocadherins are a group of transmembrane proteins belonging to the cadherin superfamily that are subgrouped into ‘clustered’ and ‘non-clustered’ protocadherins. Although cadherin superfamily members are known to regulate various forms of cell–cell interactions, including cell–cell adhesion, the functions of protocadherins have long been elusive. Recent studies are, however, uncovering their unique roles. The clustered protocadherins regulate neuronal survival, as well as dendrite self-avoidance. Combinatorial expression of clustered protocadherin isoforms creates a great diversity of adhesive specificity for cells, and this process is likely to underlie the dendritic self-avoidance. Non-clustered protocadherins promote cell motility rather than the stabilization of cell adhesion, unlike the classic cadherins, and mediate dynamic cellular processes, such as growth cone migration. Protocadherin dysfunction in humans is implicated in neurological disorders, such as epilepsy and mental retardation. This Commentary provides an overview of recent findings regarding protocadherin functions, as well as a discussion of the molecular basis underlying these functions.

**KEY WORDS:** Protocadherin, Cell–cell contact, Self-avoidance, Cell movement, Lamellipodia, WAVE complex

## Introduction

Regulation of cell–cell contacts is essential for animal morphogenesis. Cadherins are transmembrane glycoproteins that regulate cell–cell contacts through homophilic or heterophilic interactions between their extracellular regions (Takeichi, 2014). Their extracellular region is subdivided into repetitive ‘EC domains’ (also called ‘EC repeats’) (Fig. 1A), and individual EC domains are connected in tandem through a unique set of amino-acid sequences, called the cadherin motif, that function to bind to  $\text{Ca}^{2+}$  (Tsukasaki et al., 2014). Proteins that contain the cadherin motif comprise the cadherin superfamily (Hirano and Takeichi, 2012). The cadherin superfamily comprises over 100 members in vertebrates (Hulpiau and van Roy, 2009). The ‘classic’ cadherins, including neuronal (N)-cadherin (also known as Cdh2), are responsible for  $\text{Ca}^{2+}$ -dependent cell–cell adhesion in animals. The classic cadherins in vertebrates have five EC domains in their extracellular region, and their cytoplasmic regions bind to a specific group of proteins, including p120-catenin and  $\beta$ -catenin (also known as Ctnnd2 and Ctnnb1, respectively) (Takeichi, 2014).  $\beta$ -catenin simultaneously binds to  $\alpha$ -catenin (also known as

Cttnn1), an actin-binding protein, forming the cadherin–catenin complex, which plays a key role in mechanical adhesions between animal cells. p120-catenin and  $\beta$ -catenin exclusively bind to the classic cadherins and not to other cadherin superfamily members. In fact, the cytoplasmic amino-acid sequences are diversified among the cadherin superfamily members, indicating that their functions are also diversified.

Protocadherins are a subgroup of the cadherin superfamily that have the conserved cadherin motifs (Sano et al., 1993; Suzuki, 1996). Unlike the classic cadherins, protocadherins have more than five EC domains and lack the catenin binding sites in their cytoplasmic region (Fig. 1A). The term ‘protocadherin’ has been broadly used without clear definition throughout the literature, referring to various members of the cadherin superfamily. In this Commentary, we focus on two specific groups, the ‘clustered’ and ‘non-clustered’ protocadherins, which are phylogenetically distinct from other members of the cadherin superfamily (Hulpiau and van Roy, 2009). The clustered protocadherins comprise as many as 53 and 58 members in human and mouse, respectively, accounting for approximately half of the total cadherins in these organisms, whereas only around ten non-clustered protocadherins have been identified (Fig. 1B). Both groups of protocadherins are widely expressed in the nervous system of developing vertebrates, suggesting that they have roles in neural development and function. Clinical and genetic studies suggest that the dysfunction of protocadherins is related to neurological disorders and cancer in humans (Kim et al., 2011; van Roy, 2014). Below, we first review recent progress in the study of clustered and non-clustered protocadherins, before discussing protocadherin-related diseases.

## Clustered protocadherins

The clustered protocadherins comprise the protocadherin- $\alpha$  (Pcdh $\alpha$ ), protocadherin- $\beta$  (Pcdh $\beta$ ) and protocadherin- $\gamma$  (Pcdh $\gamma$ ) groups. The genes encoding the protocadherins have a characteristic genomic organization, in which the three gene clusters are arranged in tandem on a single chromosome (Wu and Maniatis, 1999) (Fig. 2A). In the mouse, the gene cluster encoding Pcdh $\alpha$  has 14 variable exons and those encoding Pcdh $\beta$  and Pcdh $\gamma$ , 22. Each variable exon encodes an extracellular domain, a transmembrane domain and a variable portion of the cytoplasmic domain. The genes encoding Pcdh $\alpha$  and Pcdh $\gamma$ , but not those encoding Pcdh $\beta$ , also contain three additional constant regions that are located downstream of the variable exons, which encode a shared C-terminus of the cytoplasmic domain. This unique gene organization allows for the production of a large diversity of protocadherin isoforms through an alternative choice of promoters that precede each of the variable exons, as well as through alternative splicing. Details of their gene regulation are reviewed elsewhere (Chen and Maniatis, 2013; Yagi, 2012).

Laboratory for Cell Adhesion and Tissue Patterning, RIKEN Center for Developmental Biology, 2-2-3 Minatojima-Minamimachi, Chuo-ku, Kobe 650-0047, Japan.

\*Authors for correspondence (hayashi@cdb.riken.jp; takeichi@cdb.riken.jp)

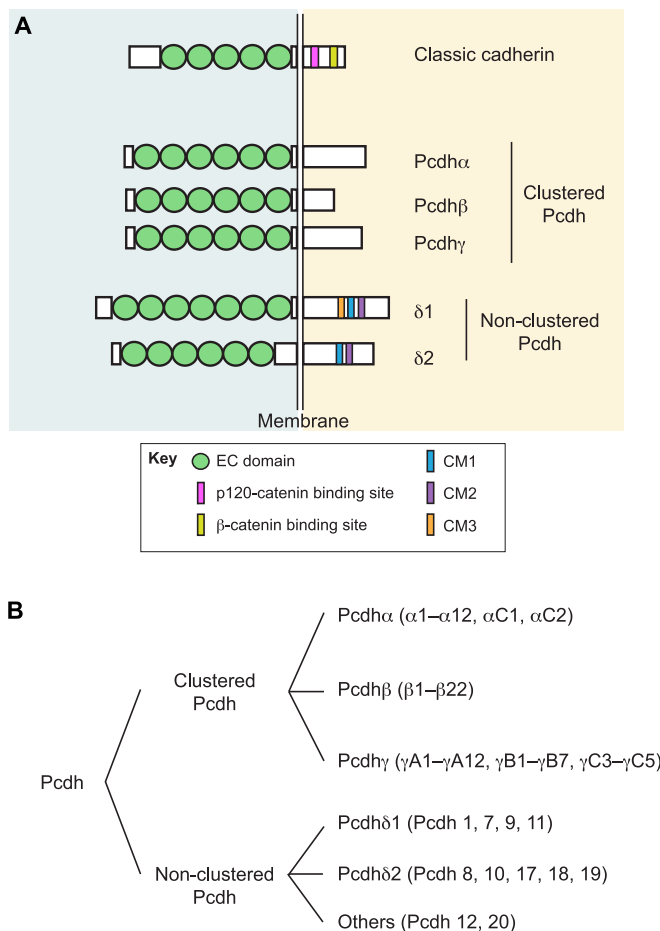

**Fig. 1. Structure and classification of the protocadherin family.** (A) Structures of clustered and non-clustered protocadherins (Pcdh) in comparison with a classic cadherin. The classic cadherins have five 'EC domains' in the extracellular region, and p120-catenin and  $\beta$ -catenin binding sites in the cytoplasmic region. The clustered protocadherins have six EC domains and no identified motifs in the cytoplasmic region. The  $\delta$ 1 and  $\delta$ 2 groups of the non-clustered protocadherins have seven and six EC domains, respectively, and both groups have conserved motifs, CM1 and CM2, in the cytoplasmic region. The  $\delta$ 1 group has an additional conserved motif, CM3. (B) A phylogenetic tree of protocadherins (Hulpiau and van Roy, 2009). In the mouse clustered protocadherins, the  $\alpha$ -group has 14 isoforms, and the  $\beta$ - and  $\gamma$ -groups have 22 each (the isoforms are given in parentheses). The non-clustered protocadherins are grouped as ' $\delta$ 1', ' $\delta$ 2' and 'others'; the members of which are shown in parentheses.

### Regulation of neurite patterning by clustered protocadherins

Knockout of the Pcdh $\alpha$  gene cluster in mice disturbs the coalescence of homotypic olfactory sensory neuron (OSN) axons into a glomerulus by inducing the formation of ectopic glomeruli (Hasegawa et al., 2008). Based on this observation, the authors of that paper propose that Pcdh $\alpha$  is required to eliminate miswired axons. Another study from the same group showed that the constitutive expression of a single Pcdh $\alpha$  isoform is sufficient to prevent ectopic glomerulus formation (Hasegawa et al., 2012), suggesting that the diversity of extracellular regions is not required for the coalescence of OSN axons.

Deletion of the entire Pcdh $\gamma$  gene cluster in mice causes them to die shortly after birth. In these mutant mice, loss of neuronal cells and synaptic alterations were observed in the spinal cord and retina (Lefebvre et al., 2008; Wang et al., 2002), suggesting that

Pcdh $\gamma$  is important for neuronal survival. Gene knockout of three Pcdh $\gamma$  isoforms that are classified as C-type genes (*Pcdhgc3*, *Pcdhgc4* and *Pcdhgc5*) results in phenotypes that are indistinguishable from those obtained when the entire Pcdh $\gamma$  cluster is deleted (Chen et al., 2012). This suggests that the C-type genes are primarily responsible for neuronal survival. Apart from the regulation of cell survival, it has been shown that the Pcdh $\gamma$  proteins mediate 'self-avoidance' between neurites in retinal starburst amacrine cells, as well as in cerebellar Purkinje cells – large GABAergic neurons that have highly branched dendrites (Lefebvre et al., 2012) (Fig. 2B). Self-avoidance is a key principle that governs neurite patterning, whereby sister dendrites of the same neuron repel each other. Recently, Slit–Robo signaling, which mediates diverse cell behaviors through the interactions between Slit ligands and Robo receptors, was also found to regulate self-avoidance (Gibson et al., 2014). That study, however, suggested that Pcdh $\gamma$  and Slit–Robo signals independently mediate dendritic self-avoidance, leaving their functional relationships to be determined in the future. In the cerebral cortex, loss of Pcdh $\gamma$  genes reduces arborization of the apical dendrites of neurons (Garrett et al., 2012). Furthermore, knockout of the Pcdh $\alpha$  cluster also impairs dendrite arbor formation in hippocampal neurons (Suo et al., 2012). The latter study additionally suggests that Pcdh $\alpha$  proteins, as well as Pcdh $\gamma$  proteins, regulate dendritic arborization by inhibiting focal adhesion kinase or proline-rich tyrosine kinase 2 (also known as Ptk2b), which is associated with the cytoplasmic regions of these protocadherins (Chen et al., 2009a). It remains to be determined whether the Pcdh-dependent dendritic self-avoidance and dendrite arborization observed in these studies depend on a common or distinct signaling mechanism(s).

### Single cell diversification through clustered protocadherins

For proper self-avoidance, neurons must distinguish between self and non-self. In connection with this notion, it has been suggested that clustered protocadherins endow neurons with diverse adhesive labels. Studies on allelic gene expression of the Pcdh $\alpha$  and Pcdh $\gamma$  gene clusters in Purkinje cells show that, although the variable exons of the C-type protocadherins are constantly expressed from both alleles, random monoallelic and combinatorial expression occurs for the variable exons encoding Pcdh $\alpha$ , Pcdh $\gamma$ A and Pcdh $\gamma$ B (Esumi et al., 2005; Kaneko et al., 2006). These findings suggest that the various isoforms of protocadherins are stochastically expressed in different combinations in individual neurons.

An *in vitro* study has demonstrated that Pcdh $\gamma$  isoforms form multimers (probably tetramers) in the cis-orientation and that these multimers show strict homophilic trans-interactions at cell–cell interfaces (Schreiner and Weiner, 2010). Intriguingly, the multimer formation occurs promiscuously among various isoforms, leading the authors of that study to predict that the 22 isoforms of Pcdh $\gamma$  could form 234,256 distinct adhesive interfaces. A recent study has further found that cells expressing different combinations of Pcdh $\alpha$ , Pcdh $\beta$  and Pcdh $\gamma$  aggregate through the homophilic trans-interactions of the protocadherins that they express; however, these cells fail to co-aggregate with cells that express a different combination of protocadherins, even when the difference is only due to one isoform in the combination (Thu et al., 2014) (Fig. 2C). It is of note that some of the clustered protocadherin isoforms, including the alternative Pcdh $\alpha$  isoforms and Pcdh $\gamma$ C4, are unable to induce cell aggregation when individually expressed in cells, but they can do so when coexpressed with other isoforms. This phenomenon has been explained by assuming that these isoforms

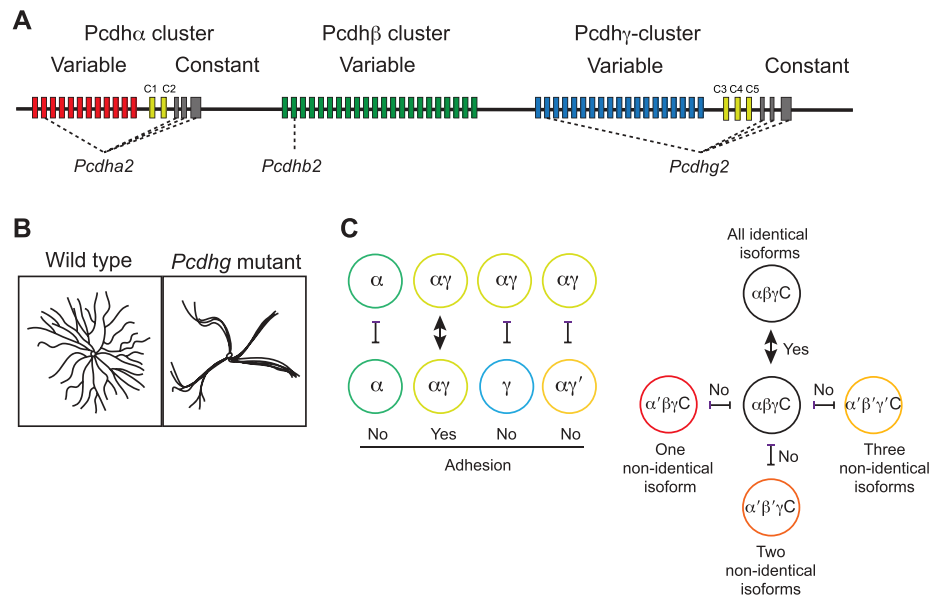

**Fig. 2. Generation of unique cell recognition properties through combinatorial expression of clustered protocadherin isoforms.** (A) Genomic organization of the clustered protocadherin genes. The generation of *Pcdha2*, *Pcdhb2* and *Pcdhg2* genes is indicated as an example of exon selection that produces various isoforms. (B) Knockout of the *Pcdhγ* gene cluster in mice results in impaired self-avoidance of dendrites. The diagrams were drawn based on the findings by Lefebvre and colleagues (Lefebvre et al., 2012). (C) Cell–cell adhesion is induced only between cells expressing the same combination of clustered protocadherins (Thu et al., 2014). Expression of a *Pcdhα* isoform alone does not induce cell–cell adhesion, probably due to its failure to transfer to the plasma membranes, whereas co-expression of *Pcdhα* and *Pcdhγ* isoforms induces cell–cell adhesion. *Pcdhα*- and *Pcdhγ*-expressing cells adhere to those that express the same combination of isoforms, but not to those expressing either *Pcdhγ* alone or the same *Pcdhα* isoform along with another *Pcdhγ* isoform (shown in the scheme on the left). A cell expressing a combination of *Pcdhα*, *Pcdhβ*, *Pcdhγ* and the C isoforms adheres to a cell with the same combination of isoforms (shown on the right). However, even a single mismatch in *Pcdhα*, *Pcdhβ* or *Pcdhγ* inhibits the adhesion. Mismatches in the C isoforms also inhibit cell adhesion. The diagrams were drawn based on the findings of Thu and colleagues (Thu et al., 2014).

are unable to localize to the plasma membranes independently but that they are rescued by ‘carrier’ isoforms. It remains undetermined whether such interdependency between isoforms also occurs in neurons *in vivo*.

Using these observations, we can speculate that a molecular mechanism exists that regulates the self- and non-self recognition of neurons. In a neuronal population, individual neurons acquire various adhesive specificities based on the combinatorial expression of clustered protocadherin isoforms, resulting in a strong heterogeneity among neurons with regard to the adhesive molecules at their surface. In such systems, neurites should be able to distinguish between those derived from the same or other neurons by detecting differences in protocadherin isoforms that are expressed on the respective surfaces. The trans-interactions of the clustered protocadherins, which can only occur successfully between a pair of neurites of the same origin, could act as a trigger for avoidance signals. The neurites responding to such signals would then repel each other, although intracellular molecular events underlying this putative repelling mechanism remain to be identified. Proteins with adhesion-promoting abilities are not often considered as repelling factors, but such opposing functions could be reconciled as discussed in the Concluding remarks. By contrast, whether the loss of *Pcdhα* and *Pcdhβ* genes also affects self-avoidance *in vivo* has not been addressed yet. This point needs to be clarified in the future.

### Non-clustered protocadherins

In contrast to the clustered protocadherins, the genes encoding the non-clustered protocadherins are scattered on multiple chromosomes. They are subgrouped into  $\delta 1$ ,  $\delta 2$  and others

(Fig. 1B) on the basis of overall homology, number of EC domains and conservation of specific amino-acid motifs (Hulpiau and van Roy, 2009; Redies et al., 2005). The  $\delta 1$  and  $\delta 2$  subgroups have seven and six EC domains, respectively. Both the  $\delta 1$ - and  $\delta 2$ -subgroups have conserved cytoplasmic motifs, CM1 and CM2, and  $\delta 1$ -protocadherins have an additional conserved motif, CM3. Recent studies have uncovered unique functions of non-clustered protocadherins, particularly for  $\delta 2$ -subfamily members, as discussed below.

### Developmental roles of $\delta 1$ -protocadherins

Among the  $\delta 1$  subfamily members, NF-protocadherin (NFPC, *Xenopus* homolog of *Pcdh7*), which is expressed in the ectoderm of *Xenopus* embryos, is the best studied. Morpholino-mediated depletion of NFPC or expression of its putative dominant-negative forms in embryos disrupts ectoderm layers and impairs neural tube closure (Bradley et al., 1998; Heggem and Bradley, 2003; Rashid et al., 2006). More recent studies have shown that the cytoplasmic domain of NFPC binds to the template-activating factor 1 (TAF1), a histone-binding protein involved in chromatin remodeling, and that depletion of TAF1 mimics that of NFPC, suggesting that NFPC requires TAF1 in order to exert its cellular functions (Heggem and Bradley, 2003; Rashid et al., 2006). The NFPC–TAF1 complex is also expressed in retinal ganglion cells in *Xenopus*, and perturbation of its activity impairs axon elongation and navigation (Leung et al., 2013; Piper et al., 2008). How NFPC functionally couples with such a transcriptional regulator, however, remains to be resolved. Another member of the  $\delta 1$  subfamily, axial protocadherin (AXPC, *Xenopus* homolog of *Pcdh1*), is expressed along the axial mesoderm in *Xenopus*

embryos, and its knockdown using morpholinos results in the loss of notochord formation (Yoder and Gumbiner, 2011). Intriguingly, the authors of that study could not detect any alterations in the adhesion-related behavior of cells, such as cell sorting, when AXPC expression was manipulated in embryos. Overall, the cellular and molecular functions of the  $\delta$ 1-protocadherins largely remain mysterious.

### $\delta$ 2-protocadherins in early development

The  $\delta$ 2 subfamily comprises five members – Pcdh8, Pcdh10, Pcdh17, Pcdh18 and Pcdh19 (Table 1). Their functions in early development have been studied in *Xenopus* and zebrafish. In *Xenopus* embryos, paraxial protocadherin (PAPC, *Xenopus* homolog of Pcdh8) is expressed at paraxial mesoderm, in contrast to the expression of AXPC at axial mesoderm (Kim et al., 1998). Earlier studies suggested that PAPC plays a role in cell sorting and convergent extension during *Xenopus* gastrulation (Kim et al., 1998). More recent studies have shown that PAPC controls these morphogenetic events by downregulating the adhesion activity of C-cadherin, an important classic cadherin that is expressed in *Xenopus* embryos; this process is required for normal gastrulation in *Xenopus* embryos (Chen and Gumbiner, 2006). Regulation of early morphogenesis through the  $\delta$ 2-group protocadherins has also been reported in zebrafish. In those studies, knockdown of *pcdh18a* by using morpholino oligonucleotides causes delayed epiboly – a cell sheet movement that occurs during gastrulation of embryos – and impaired cell movements (Aamar and Dawid, 2008), and *pcdh19* knockdown results in impaired convergence during neurulation (Emond et al., 2009). These findings suggest that  $\delta$ 2-protocadherins play a role in cell movement and rearrangement during the early morphogenesis of embryos. Notably, however, gene knockout of *Pcdh8* in mice does not lead to any detectable defects in mesodermal morphogenesis (Yamamoto et al., 2000). It is therefore important to further

confirm the roles of  $\delta$ 2-protocadherins in embryogenesis using multiple model systems and methods.

### Role of $\delta$ 2-protocadherins in axon growth and patterning

The members of the  $\delta$ 2 subfamily are widely expressed in the nervous system (Hertel et al., 2008; Kim et al., 2007; Kim et al., 2010; Krishna et al., 2011). Pcdh10 (also known as OL-protocadherin) and Pcdh17 are detected along axon fibers (Hayashi et al., 2014; Uemura et al., 2007), suggesting that they are involved in axon development or function. It has, indeed, been reported that gene knockout of *Pcdh10* in mice causes defects in the formation of various axon tracts, such as the thalamocortical and corticospinal tracts that connect the cerebral cortex and other regions of the central nervous system (Uemura et al., 2007). However, analysis of another *Pcdh10*-knockout mouse line, which was generated independently of that used in the study described previously, failed to detect such phenotypes (I. Kahr, F. van Roy and S. Hirano, personal communication). Therefore, the phenotypes of the brains of *Pcdh10*-deficient mice need further examination.

Another report has shown that *Pcdh17* knockout in mice results in defects in the extension of axons from specific subdivisions of the amygdala, a center in the brain that regulates emotions and motivation (Hayashi et al., 2014). This phenotype has been confirmed through observations of impaired axon growth from amygdala fragments that had been explanted *in vitro*, supporting the idea that Pcdh17 mediates axon growth. In zebrafish, knockdown of *pcdh18b* causes defects in axon arborization of primary motoneurons (Biswas et al., 2014). In this case, depletion of Pcdh18b does not affect the growth of motoneurons themselves, but affects the density of filopodia along the shaft of elongating axons. The potential molecular mechanisms underlying Pcdh17-dependent axon growth are discussed in later sections.

**Table 1. Overview of the  $\delta$ 2-protocadherin group**

| Subtype | Other name and/or isoform | Species analyzed | Intracellular binding proteins         | Knockdown or knockout phenotypes                              | References                                                                             |
|---------|---------------------------|------------------|----------------------------------------|---------------------------------------------------------------|----------------------------------------------------------------------------------------|
| Pcdh8   | PAPC                      | <i>Xenopus</i>   | ANR5, Sprouty, Casein kinase 2 $\beta$ | Impaired cell movement in gastrulation                        | Chen and Gumbiner, 2006; Chung et al., 2007; Kietzmann et al., 2012; Wang et al., 2008 |
|         |                           | Mouse            |                                        | No detectable defects in mesodermal movement                  | Yamamoto et al., 2000                                                                  |
|         | Arcadlin                  | Rat and mouse    | TAO2 $\beta$                           | Excess synapse number upon stimulation in hippocampal neurons | Yasuda et al., 2007                                                                    |
|         |                           | Human            | WAVE complex                           | n.d.                                                          | Chen et al., 2014*                                                                     |
| Pcdh10  | OL-pc                     | Mouse            | WAVE complex                           | Impaired axon growth in ventral telencephalon                 | Uemura et al., 2007                                                                    |
| Pcdh17  |                           | Mouse            | WAVE complex                           | Impaired amygdala axon growth                                 | Hayashi et al., 2014                                                                   |
|         |                           | Mouse            |                                        | Excess synaptic vesicles in basal ganglia                     | Hoshina et al., 2013                                                                   |
| Pcdh18  | Pcdh18a                   | Zebrafish        |                                        | Impaired cell movement in epiboly                             | Aamar and Dawid, 2008                                                                  |
|         | Pcdh18b                   | Zebrafish        | WAVE complex                           | Motoaxon arborization defects                                 | Biswas et al., 2014                                                                    |
|         |                           | Mouse            | Dab1                                   | n.d.                                                          | Homayouni et al., 2001                                                                 |
| Pcdh19  |                           | Zebrafish        |                                        | Impaired cell movement in neurulation                         | Emond et al., 2009                                                                     |
|         |                           | Chick            | WAVE complex                           | n.d.                                                          | Tai et al., 2010                                                                       |

n.d., not determined.

\*This study showed biochemical interactions between the WAVE complex and each of Pcdh8, Pcdh10, Pcdh17, Pcdh18 and Pcdh19.



### $\delta$ 2-protocadherins at synapses

Activity-regulated cadherin-like protein (arcadlin), rat homolog of Pcdh8 (Table 1), was originally identified as a product of the gene of which the expression is rapidly and transiently increased in rat hippocampal granule cells after neuronal stimulation (Yamagata et al., 1999). Upon stimulation, arcadlin mRNA expression increases more than ten-fold, and its protein products are recruited to synaptic puncta in cultured hippocampal neurons. Arcadlin associates with N-cadherin, and its shorter isoform, but not the longer one, also interacts with a spliced form of TAO2 kinase (TAO2 $\beta$ ) through the cytoplasmic region of arcadlin (Yasuda et al., 2007). The homophilic interactions between arcadlins result in activation of TAO2 $\beta$ , and the active TAO2 $\beta$ , in turn, activates p38MAK. These signaling events induce the endocytosis of the arcadlin–N-cadherin complex (Fig. 3A). That study also showed that the number of dendritic spines, structures that are involved in excitatory synapse formation, increases in arcadlin-knockout mice. These observations suggest that arcadlin functions to downregulate N-cadherin that is important for synapse stability (Takeichi and Abe, 2005), leading to enhanced spine dynamics.

A recent study has reported that Pcdh17 is localized at perisynaptic regions in both excitatory and inhibitory synapses of the basal ganglia nuclei and that knockout of the gene causes enhanced presynaptic vesicle accumulation in corticobasal ganglia (Hoshina et al., 2013). In that study, however, the molecular

mechanisms by which Pcdh17 regulates synapses were not analyzed. Another study has suggested that Pcdh10 is involved in the synapse elimination that is induced through the fragile X mental retardation 1 protein (FMR1)-dependent activation of myocyte enhancer factor 2 (Mef2)-family members (Tsai et al., 2012). In this synapse elimination process, PSD-95, a postsynaptic scaffold protein that has a role in anchoring synaptic proteins, is ubiquitinated and then degraded by the proteasome. Pcdh10 was found to enhance PSD-95 degradation by mediating the interactions between PSD-95 and the proteasome, although detailed molecular mechanisms of this process remain unknown. Thus,  $\delta$ 2-protocadherins appear to regulate synapse dynamics. However, the studies on this subject are still fragmentary, and more defined roles of  $\delta$ 2-protocadherins in synapse functions need to be clarified.

### $\delta$ 2-protocadherins modulate classic-cadherin-mediated cell–cell adhesion

Similar to the classic cadherins,  $\delta$ 2-protocadherins accumulate at cell–cell contact sites through homophilic interactions (Hayashi et al., 2014; Hirano et al., 1999; Nakao et al., 2008; Tai et al., 2010). So far, it appears that trans-interactions occur only between the same subtypes (Hoshina et al., 2013; Tai et al., 2010) (S.H., unpublished data). Despite their ability to form homophilic interactions, the  $\delta$ 2-protocadherins are, however, less capable of inducing the aggregation of cells in suspension cultures than the classic cadherins (Hirano et al., 1999; Tai et al., 2010), and in the case of PAPC/Pcdh8 and arcadlin/Pcdh8, they do not promote any cell aggregation (Chen and Gumbiner, 2006; Yasuda et al., 2007). These observations imply that the homophilic trans-interactions between  $\delta$ 2-protocadherins regulate cell–cell contacts beyond simple mechanical adhesion between cells, as is the case for the clustered protocadherins. In fact, as mentioned already, arcadlin/Pcdh8 induces the endocytosis of N-cadherin through physically binding to it (Yasuda et al., 2007), and PAPC/Pcdh8 antagonizes C-cadherin-mediated adhesion (Chen and Gumbiner, 2006; Chen et al., 2009b). Another study of PAPC suggests that PAPC and C-cadherin independently bind to the Wnt receptor Frizzled-7, and that the formation of these complexes prevents C-cadherin from clustering in a Wnt-11-dependent manner, leading to the weakening of C-cadherin-mediated adhesion (Kraft et al., 2012). Pcdh19 has also been shown to bind to N-cadherin (Biswas et al., 2010).

These studies suggest that  $\delta$ 2-protocadherins suppress classic-cadherin-mediated adhesion in various ways. As discussed in the following sections,  $\delta$ 2-protocadherins regulate actin polymerization, indicating the presence of another mechanism that affects classic-cadherin-dependent adhesion. The classic cadherins also interact with actin filaments (Takeichi, 2014), but in a manner that is distinct from that used by  $\delta$ 2-protocadherins; this difference might cause functional interference between the two adhesion systems (Fig. 3B).

### $\delta$ 2-protocadherins bind to the WAVE complex and regulate cell motility

Several lines of evidence suggest that one or multiple regions in the cytoplasmic domain of  $\delta$ 2-protocadherins bear adhesion-suppressing functions. For instance, Pcdh17 mutants that lack these cytoplasmic regions induce the lateral clumping of axons when exogenously expressed in neurons of embryonic brains (Hayashi et al., 2014). Similarly, Pcdh19 variants, from which the cytoplasmic region has been deleted, induce the formation of

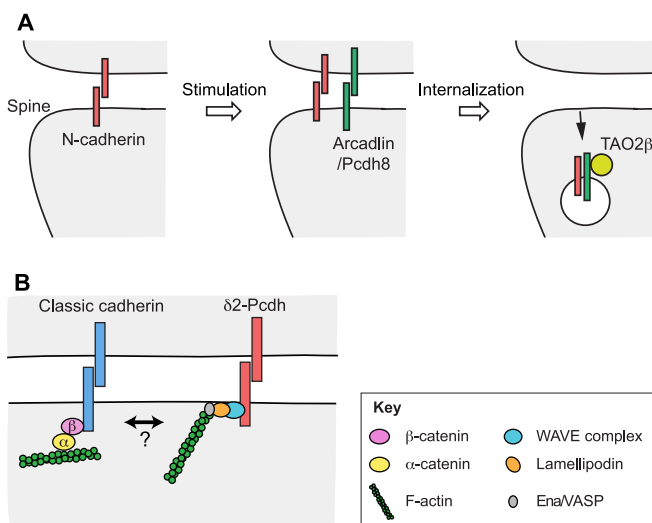

**Fig. 3. Potential interactions between  $\delta$ 2-protocadherins and classic cadherins.** (A) A model for arcadlin/Pcdh8-mediated internalization of N-cadherin, triggered by neuronal stimulation, which occurs in excitatory synapses of neurons. Arcadlin homophilic interaction induces internalization of N-cadherin through its binding to TAO2 $\beta$ . The diagrams were drawn based on the findings of Yasuda and colleagues (Yasuda et al., 2007). (B)  $\delta$ 2-protocadherins and classic cadherins interact with the actin cytoskeleton through distinct cytoplasmic partners. Only representative cytoplasmic factors are depicted. All  $\delta$ 2-protocadherins interact with the WAVE complex. Lamellipodin and Ena/VASP associate with the Pcdh17-bound WAVE, and Ena/VASP is assumed to regulate actin polymerization (Hayashi et al., 2014). In the classic-cadherin-based adhesion,  $\alpha$ -catenin mediates the linkage of cadherin with actomyosin filaments; without this linkage, cadherins are unable to induce firm cell–cell adhesion (Takeichi, 2014). If these two actin-interacting systems are physiologically incompatible at cell junctions, either system might exclude the other.

larger aggregates than full-length Pcdh19 when they are expressed in L cells, a fibroblastic cell line (Tai et al., 2010). Thus, cytoplasmic regions of  $\delta 2$ -protocadherins appear to have an adhesion-inhibiting role.

Efforts to seek molecules that regulate the cytoplasmic function of  $\delta 2$ -protocadherins have identified Nap1 (also known as Nckap1), a component of the WASP family verprolin-homologous protein (WAVE) complex (Krause and Gautreau, 2014), as a binding partner of several members of the  $\delta 2$  group (Biswas et al., 2014; Hayashi et al., 2014; Nakao et al., 2008; Tai et al., 2010) (Table 1). In addition to Nap1, other components of the WAVE complex also associate with  $\delta 2$ -protocadherins, which suggests that the entire complex interacts with them (Fig. 3B). Recent studies have identified a key motif, termed ‘WIRS’, within the cytoplasmic region of  $\delta 2$ -protocadherins as being responsible for their binding to the WAVE complex (Chen et al., 2014). This motif recognizes an interaction surface that is formed through the Sra- and Abi-family subunits of the WAVE complex. In the case of Pcdh17, the WAVE complex not only binds to the WIRS-containing region but also to an additional site that is located in the N-terminal half of its cytoplasmic region (Hayashi et al., 2014).

The WAVE complex regulates actin dynamics by activating Arp2/3 (Krause and Gautreau, 2014). Alternatively, it can interact with lamellipodin (Lpd; also known as Raph1) through Abi proteins (Law et al., 2013). Lpd is known to bind to Ena/VASP-family proteins (referred to here as Ena/VASP), other regulators of actin polymerization, and Lpd plays a crucial role in advancing the lamellipodia in migrating cells (Krause et al., 2004). We have found recently that the WAVE complex, bound to Pcdh17, interacts with Lpd and Ena/VASP, rather than Arp2/3 (Hayashi et al., 2014) (Fig. 3B). Experiments in astrocytoma U251 cells, which do not express endogenous  $\delta 2$ -protocadherins, have revealed that the WAVE complex is normally localized at the leading edge or the lamellipodia of cells during their migration but

that it disappears from these sites when the lamellipodia have collided with one another (Hayashi et al., 2014) (Fig. 4A). However, when Pcdh17 is exogenously expressed in these cells, the WAVE complex is not removed from the initial cell–cell contact sites, because its binding partner Pcdh17 accumulates there. Shortly after the collision of cells, Pcdh17 and the WAVE complex become concentrated at a peripheral region of cell–cell contacts (Fig. 4B). Remarkably, the peripheral contact region containing Pcdh17 and the WAVE complex actively moves forward (Hayashi et al., 2014). Time-lapse imaging has revealed that the membranes organizing these special contacts behave like the leading edges – displaying ruffling and retrograde movement – suggesting that these contact sites are converted into a leading-edge-like structure. Furthermore, in confluent cultures of U251 cells, expression of Pcdh17 (or Pcdh10) accelerates the migration of individual cells (Hayashi et al., 2014; Nakao et al., 2008). These observations suggest that Pcdh17 facilitates the motility of membranes at cell–cell contact sites by recruiting a specific set of actin polymerization regulators – the WAVE-complex, Lpd and Ena/VASP – to these sites and thereby promotes cell migration.

In general, cell migratory behavior is controlled through contact inhibition of cell locomotion (CIL) (Abercrombie, 1979). When two cells touch one another, their lamellipodia seize, resulting in their migration coming to a halt. The disappearance of the WAVE complex from contact sites in normal U251 cells, therefore, is in accordance with the idea of CIL, whereas Pcdh17-expressing cells appear to violate the CIL rule by maintaining the WAVE complex at cell–cell contacts. As it is thought that the establishment of CIL involves the classic cadherins (Theveneau et al., 2010), Pcdh17 might counteract CIL not only by facilitating membrane motility at cell–cell contacts but also by suppressing the classic cadherins. Consistently, our unpublished observations show that N-cadherin does not colocalize with the Pcdh17–WAVE complex, although it appears to localize with Pcdh17 outside of the WAVE complex (Fig. 4B).

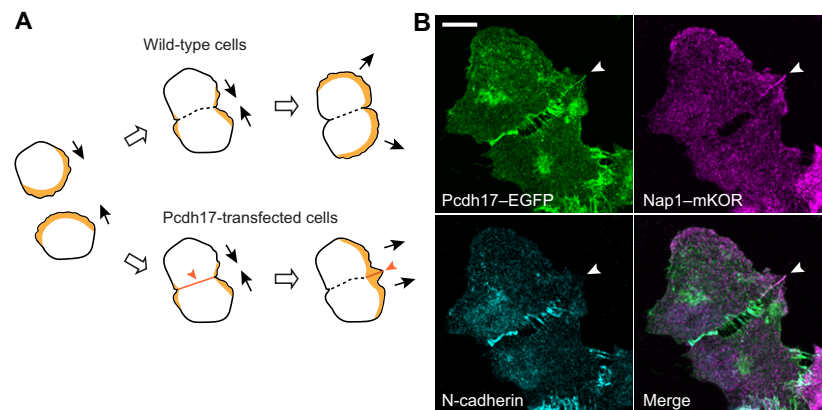

**Fig. 4. Pcdh17 regulates cell motility by recruiting the WAVE complex to peripheral cell–cell contacts.** (A) The behavior of U251 cells (lacking endogenous Pcdh17) after their collision. When two wild-type cells collide, lamellipodia (orange) and associated proteins are lost from their contact sites. However, when Pcdh17-expressing U251 cells collide, lamellipodial proteins – such as the WAVE complex – remain at their contact sites (red arrowhead, lower middle). Subsequently, these proteins become concentrated only at a peripheral cell–cell contact and induce a protrusion of the in-contact membranes (red arrowhead, lower right), which actively moves forward. The black arrows indicate the direction of cell migration. (B) Fluorescence images of U251 cells co-transfected with enhanced green fluorescent protein (EGFP)-tagged Pcdh17 and monomeric Kusabira Orange (mKOR)-tagged Nap1. EGFP (green), mKOR (purple) and endogenous N-cadherin (cyan) are visualized by using triple immunostaining. Pcdh17 is concentrated throughout cell–cell boundaries, whereas it colocalizes with Nap1 (a WAVE complex subunit) only at a peripheral contact site (arrowhead). N-cadherin is concentrated at large areas of cell–cell boundaries and colocalizes with Pcdh17 at these areas, but not at the site where Pcdh17 colocalizes with Nap1 (S.H., unpublished observation), suggesting that the Pcdh17–WAVE complex might exclude N-cadherin from cell–cell contacts. Scale bar: 10  $\mu$ m.

### Potential mechanisms of $\delta 2$ -protocadherin-mediated axon extension

Using observations from cell biology experiments of  $\delta 2$ -protocadherin-mediated regulation of cell motility, we can also infer their role in axon extension, which is defective in *Pcdh17*-knockout mice (Hayashi et al., 2014). Growth cones of axons derived from wild-type and *Pcdh17*-deficient amygdala migrate to equal extents on culture dishes. However, we have found a difference in their behaviors when the growth cones meet other axons (Fig. 5A). Wild-type growth cones continue to migrate along the encountered axons, although some of them simply cross the axons. By contrast, growth cones from *Pcdh17*-knockouts tend to stop moving at the contact points (Hayashi et al., 2014). This cessation of growth cone movement is reminiscent of CIL, leading us to propose that, in normal axons, *Pcdh17* counteracts CIL processes, thereby allowing the growth cones to migrate on other axons. Consistent with the observations described above, WAVE complex, Lpd and Mena (an Ena/VASP-family protein that is also known as Enah) are all concentrated at growth cone–axon contact sites in wild-type neurons, but not in *Pcdh17*-null neurons. Thus, the complex comprising *Pcdh17*, Lpd, Mena and the WAVE complex might sustain growth cone migration by enhancing actin elongation at cell–cell contact sites, as the Lpd–Mena (Ena/VASP) complex has been found to exert this effect at free cell edges, or by destabilizing the adhesion between growth cones and axons, in which the classic cadherins presumably are involved (Fig. 5B). It is also possible that both of these possible mechanisms cooperate. These ideas are consistent with the observation that *Pcdh17* mutants that are unable to bind the WAVE complex induce the clumping of axons *in vivo* (Hayashi et al., 2014).

The above models of *Pcdh17*-dependent axon extension have been proposed based on the observations made using U251 cells. However, the way of contact formation is not identical between U251 cells and growth cones – when two *Pcdh17*-positive U251 cells meet, they organize a symmetrical *Pcdh17*-mediated contact and move together (Fig. 4A). However, growth cones generally

attach to the stalk of another axon, which is not motile, forming an asymmetrical contact (Fig. 5B). Further investigation is therefore necessary in order to confirm whether the mechanisms disclosed using U251 cells also operate in growth cones.

Embryonic brains express multiple  $\delta 2$ -protocadherin subtypes, each of which is expressed by distinct neuronal populations (Hertel et al., 2008; Kim et al., 2007; Kim et al., 2010; Krishna et al., 2011). Because of their binding specificities, it is expected that each of the  $\delta 2$ -protocadherins exclusively mediates the interactions between axons expressing the same  $\delta 2$ -protocadherin subtype, and therefore serves to aid the sorting of axons that are derived from different groups of neurons. Consistently, forced expression of *Pcdh17* in a group of axons that did not originally express this protocadherin changes their extension path and leads them to intermingle with axons that endogenously express the same  $\delta 2$ -protocadherin (Hayashi et al., 2014), supporting the idea that  $\delta 2$ -protocadherins might be involved in axon sorting. By contrast, despite the broad expression of  $\delta 2$ -protocadherins in the brain, abnormalities in brain morphogenesis have been detected in only restricted regions of the brains of  $\delta 2$ -protocadherin-knockout mice (Hayashi et al., 2014; Uemura et al., 2007). Although the failure to detect phenotypes in knockout mice can be explained by assuming the functional redundancy of the genes or proteins that have been analyzed, it is equally possible that conventional histology does not detect subtle deficiencies occurring in a small population of neuronal cells. To overcome such potential technical problems, the genetic labeling of a subpopulation of cells expressing a particular protocadherin subtype might be an appropriate approach, as has been done for the classic cadherins (Duan et al., 2014).

### Protocadherin dysfunction in neurological disorders and cancer

Protocadherin dysfunction has been implicated in neurological disorders, such as epilepsy, autism and schizophrenia (Hirabayashi and Yagi, 2014; Kim et al., 2011). Among the defects in protocadherin genes, mutations of *PCDH19* located on the X-chromosome have been studied most extensively. Clinical evidence indicates that *PCDH19* mutations cause epilepsy and mental retardation restricted to females (EMFR) (Duszyc et al., 2015). EMFR is an early infantile epileptic encephalopathy that phenotypically resembles Dravet syndrome, which is mainly caused by mutations in *SCN1A* – a gene encoding the voltage-dependent  $\text{Na}^+$ -channel  $\alpha$  subunit 1 protein. Mutations in the *PCDH19* gene are now identified as the second most clinically relevant cause of epilepsy, after mutations in *SCN1A* (Duszyc et al., 2015). Mutations in *PCDH19* mainly arise *de novo*, but in the case of families with EMFR, a unique pattern of inheritance is observed – only females carrying heterozygous mutations are affected, whereas males that have the same mutations are not. Despite the increase in clinical evidence for *PCDH19* mutations in EMFR, the molecular mechanisms that cause EMFR are totally unknown.

Protocadherins are also implicated in tumorigenesis (van Roy, 2014). Long-range epigenetic silencing occurs in the chromosomes that contain the clustered protocadherins during colorectal tumorigenesis, as well as in a form of kidney cancer known as Wilms' tumor (Dallosso et al., 2009; Dallosso et al., 2012). Non-clustered protocadherin genes are also subject to epigenetic silencing in tumors or deletion of chromosomes (Kim et al., 2011; van Roy, 2014). Notably, homozygous deletion

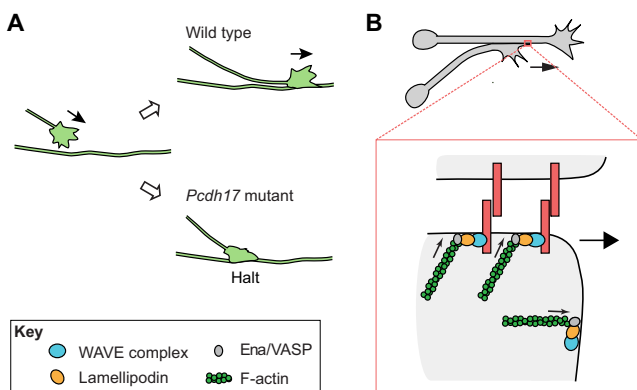

**Fig. 5. *Pcdh17* regulates growth cone motility.** (A) Schematic illustration of growth cone behavior after contact with another axon. When both axons express *Pcdh17* (wild type), the growth cones are able to migrate along the axon they encounter, whereas *Pcdh17*-deficient growth cones become stuck at the contact point with another axon. (B) A model for *Pcdh17*-mediated axon extension. *Pcdh17* recruits the WAVE complex, lamellipodin and Ena/VASP to the contact sites between a growth cone and another axon. This might accelerate the motility of the cell membranes that are in contact by regulating actin polymerization in a way similar to that which occurs at the leading edge of migrating cells. This process might compete with the classic cadherin-dependent CIL.



of chromosome 13q21, which contains four non-clustered protocadherins (*PCDH8*, *PCDH9*, *PCDH17* and *PCDH20*), often occurs in prostate cancers, as well as in breast cancer cell lines (Cerami et al., 2012; Yu et al., 2008). Based on these findings, protocadherins are thought to be tumor suppressors, although their relevance to tumorigenesis requires further investigation.

### Concluding remarks

It is now clear that the biological functions of the clustered and non-clustered protocadherins are quite distinct from those of the classic cadherins. The classic cadherins are essential for stabilizing cell–cell adhesion, protocadherins appear to antagonize or weaken cell–cell adhesion. Clustered protocadherins are important for self-avoidance of neurites, and some of the non-clustered protocadherins promote cell motility. Despite such apparently anti-adhesive functions, many of the protocadherins, although not all of them, do promote cell aggregation under experimental conditions, causing a paradox with regard to their cellular functions. It is highly probable that the homophilic interactions between protocadherins through their extracellular regions are prerequisite to produce cytoplasmic signals, and this initial interaction promotes a mechanical linkage of apposed cell membranes, that is, cell adhesion. However, it can be assumed that such extracellular interactions, in turn, interfere with the classic-cadherin-based adhesion, resulting in a competition between the adhesion-promoting and -inhibiting actions of the cadherins and protocadherins, respectively. In the case of *Pcdh17*, the binding of the WAVE complex to *Pcdh17* occurs only at peripheral sites, probably owing to the presence of active Rac there (Hayashi et al., 2014), even though *Pcdh17* is distributed throughout cell–cell contacts (Fig. 4B). This suggests that the ability of *Pcdh17* to antagonize cell adhesions, which requires cytoplasmic partners, is elicited only at localized sites of the cells. Therefore, the ability of protocadherins to either promote cell adhesion or inhibit it might be regulated through the physiological cellular contexts.

A number of other problems remain to be clarified. To further understand the *in vivo* functions of the clustered protocadherins, it is important to determine whether *Pcdh $\alpha$*  and *Pcdh $\beta$*  isoforms also regulate self-avoidance between neurites, and whether the clustered-protocadherins have any other roles. Continued analyses of such knockout mice should be helpful to this end. It is also important to identify cytoplasmic factors that interact with clustered protocadherins in order to investigate the molecular mechanisms of how these protocadherins control neurite patterning, including self-avoidance. Live imaging of neurites undergoing self-avoidance would be helpful in order to elucidate the cellular mechanisms underlying this process, which has been successfully used to analyze the avoidance of Purkinje cell dendrites (Fujishima et al., 2012). It is also crucial for our global understanding of the functions of this molecular group to determine whether and how the *Pcdh $\gamma$* -dependent self-avoidance is related to its reported role in cell survival.

Concerning the non-clustered group, the *in vivo* analysis of  $\delta$ 1-protocadherins using knockout mice has not been reported yet, and therefore this line of analysis is urgent. With regards to molecular mechanisms, it is important to identify the functions of CM1 and CM2 motifs, which are conserved not only in the  $\delta$ 1 but also in the  $\delta$ 2 group. A recent finding that these motifs in PAPC contain GSK3-dependent phosphorylation sites (Kai et al., 2015) provides a clue for this line of studies. As for the reported

functions of  $\delta$ 2-protocadherins, our molecular interpretations of how they facilitate cell motility and affect classic-cadherin-mediated adhesion are still incomplete. It is therefore urgent to uncover more detailed mechanisms by which the complex of  $\delta$ 2-protocadherin, WAVE complex, Lpd and Ena/VASP regulates actin dynamics and enhances membrane motility at cell–cell interfaces, and how these processes promote cell migration. In addition, various cytoplasmic factors have been reported as binding partners for different  $\delta$ 2-protocadherin subtypes (Table 1). It is therefore necessary to ascertain whether the subtypes of this molecular group have any subtype-specific functions. Finally, linking the basic studies of protocadherins to protocadherin-related diseases is most important, as it might contribute to the development of therapeutic strategies. Overall, studies of the protocadherins are steadily progressing, deepening our understanding of cell–cell interacting mechanisms, as well as contributing to efforts to treat human brain diseases.

### Acknowledgements

We thank Irene Kahr and Frans van Roy (Ghent University, Belgium) and Shinji Hirano (Kansai Medical University, Japan) for unpublished information.

### Competing interests

The authors declare no competing or financial interests.

### Funding

Work in the author's laboratory was supported by the program Grants-in-Aid for Specially Promoted Research of the Ministry of Education, Science, Sports, and Culture of Japan [grant number 20002009 to M.T.].

### References

- Aamar, E. and Dawid, I. B. (2008). Protocadherin-18a has a role in cell adhesion, behavior and migration in zebrafish development. *Dev. Biol.* **318**, 335–346.
- Abercrombie, M. (1979). Contact inhibition and malignancy. *Nature* **281**, 259–262.
- Biswas, S., Emond, M. R. and Jontes, J. D. (2010). Protocadherin-19 and N-cadherin interact to control cell movements during anterior neurulation. *J. Cell Biol.* **191**, 1029–1041.
- Biswas, S., Emond, M. R., Duy, P. Q., Hao, T., Beattie, C. E. and Jontes, J. D. (2014). Protocadherin-18b interacts with Nap1 to control motor axon growth and arborization in zebrafish. *Mol. Biol. Cell* **25**, 633–642.
- Bradley, R. S., Espeseth, A. and Kintner, C. (1998). NF-protocadherin, a novel member of the cadherin superfamily, is required for *Xenopus* ectodermal differentiation. *Curr. Biol.* **8**, 325–334.
- Cerami, E., Gao, J., Dogrusoz, U., Gross, B. E., Sumer, S. O., Aksoy, B. A., Jacobsen, A., Byrne, C. J., Heuer, C. J., Larpin, M. L., et al. (2012). The cBio cancer genomics portal: an open platform for exploring multidimensional cancer genomics data. *Cancer Discov.* **2**, 401–404.
- Chen, X. and Gumbiner, B. M. (2006). Paraxial protocadherin mediates cell sorting and tissue morphogenesis by regulating C-cadherin adhesion activity. *J. Cell Biol.* **174**, 301–313.
- Chen, W. V. and Maniatis, T. (2013). Clustered protocadherins. *Development* **140**, 3297–3302.
- Chen, J., Lu, Y., Meng, S., Han, M. H., Lin, C. and Wang, X. (2009a).  $\alpha$ - and  $\gamma$ -Protocadherins negatively regulate PYK2. *J. Biol. Chem.* **284**, 2880–2890.
- Chen, X., Koh, E., Yoder, M. and Gumbiner, B. M. (2009b). A protocadherin-cadherin-FLRT3 complex controls cell adhesion and morphogenesis. *PLoS ONE* **4**, e8411.
- Chen, W. V., Alvarez, F. J., Lefebvre, J. L., Friedman, B., Nwakeze, C., Geiman, E., Smith, C., Thu, C. A., Tapia, J. C., Tasic, B. et al. (2012). Functional significance of isoform diversification in the protocadherin gamma gene cluster. *Neuron* **75**, 402–409.
- Chen, B., Brinkmann, K., Chen, Z., Pak, C. W., Liao, Y., Shi, S., Henry, L., Grishin, N. V., Bogdan, S. and Rosen, M. K. (2014). The WAVE regulatory complex links diverse receptors to the actin cytoskeleton. *Cell* **156**, 195–207.
- Chung, H. A., Yamamoto, T. S. and Ueno, N. (2007). ANR5, an FGF target gene product, regulates gastrulation in *Xenopus*. *Curr. Biol.* **17**, 932–939.
- Dallosso, A. R., Hancock, A. L., Szemes, M., Moorwood, K., Chilukamarri, L., Tsai, H. H., Sarkar, A., Barasch, J., Vuononvirta, R., Jones, C. et al. (2009). Frequent long-range epigenetic silencing of protocadherin gene clusters on chromosome 5q31 in Wilms' tumor. *PLoS Genet.* **5**, e1000745.
- Dallosso, A. R., Øster, B., Greenhough, A., Thorsen, K., Curry, T. J., Owen, C., Hancock, A. L., Szemes, M., Paraskeva, C., Frank, M. et al. (2012). Long-range epigenetic silencing of chromosome 5q31 protocadherins is involved in



- early and late stages of colorectal tumorigenesis through modulation of oncogenic pathways. *Oncogene* **31**, 4409–4419.
- Duan, X., Krishnaswamy, A., De la Huerta, I. and Sanes, J. R. (2014). Type II cadherins guide assembly of a direction-selective retinal circuit. *Cell* **158**, 793–807.
- Duszyk, K., Terczynska, I. and Hoffman-Zacharska, D. (2015). Epilepsy and mental retardation restricted to females: X-linked epileptic infantile encephalopathy of unusual inheritance. *J. Appl. Genet.* **56**, 49–56.
- Emond, M. R., Biswas, S. and Jontes, J. D. (2009). Protocadherin-19 is essential for early steps in brain morphogenesis. *Dev. Biol.* **334**, 72–83.
- Esumi, S., Kakazu, N., Taguchi, Y., Hirayama, T., Sasaki, A., Hirabayashi, T., Koide, T., Kitsukawa, T., Hamada, S. and Yagi, T. (2005). Monoallelic yet combinatorial expression of variable exons of the protocadherin-alpha gene cluster in single neurons. *Nat. Genet.* **37**, 171–176.
- Fujishima, K., Horie, R., Mochizuki, A. and Kengaku, M. (2012). Principles of branch dynamics governing shape characteristics of cerebellar Purkinje cell dendrites. *Development* **139**, 3442–3455.
- Garrett, A. M., Schreiner, D., Lobas, M. A. and Weiner, J. A. (2012).  $\gamma$ -protocadherins control cortical dendrite arborization by regulating the activity of a FAK/PKC/MARCKS signaling pathway. *Neuron* **74**, 269–276.
- Gibson, D. A., Tymanskyj, S., Yuan, R. C., Leung, H. C., Lefebvre, J. L., Sanes, J. R., Chédotal, A. and Ma, L. (2014). Dendrite self-avoidance requires cell-autonomous slit/robo signaling in cerebellar purkinje cells. *Neuron* **81**, 1040–1056.
- Hasegawa, S., Hamada, S., Kumode, Y., Esumi, S., Katori, S., Fukuda, E., Uchiyama, Y., Hirabayashi, T., Mombaerts, P. and Yagi, T. (2008). The protocadherin-alpha family is involved in axonal coalescence of olfactory sensory neurons into glomeruli of the olfactory bulb in mouse. *Mol. Cell. Neurosci.* **38**, 66–79.
- Hasegawa, S., Hirabayashi, T., Kondo, T., Inoue, K., Esumi, S., Okayama, A., Hamada, S. and Yagi, T. (2012). Constitutively expressed Protocadherin- $\alpha$  regulates the coalescence and elimination of homotypic olfactory axons through its cytoplasmic region. *Front. Mol. Neurosci.* **5**, 97.
- Hayashi, S., Inoue, Y., Kiyonari, H., Abe, T., Misaki, K., Moriguchi, H., Tanaka, Y. and Takeichi, M. (2014). Protocadherin-17 mediates collective axon extension by recruiting actin regulator complexes to interaxonal contacts. *Dev. Cell* **30**, 673–687.
- Heggen, M. A. and Bradley, R. S. (2003). The cytoplasmic domain of *Xenopus* NF-protocadherin interacts with TAF1/set. *Dev. Cell* **4**, 419–429.
- Hertel, N., Krishna-K, Nuernberger, M. and Redies, C. (2008). A cadherin-based code for the divisions of the mouse basal ganglia. *J. Comp. Neurol.* **508**, 511–528.
- Hirabayashi, T. and Yagi, T. (2014). Protocadherins in neurological diseases. *Adv. Neurobiol.* **8**, 293–314.
- Hirano, S. and Takeichi, M. (2012). Cadherins in brain morphogenesis and wiring. *Physiol. Rev.* **92**, 597–634.
- Hirano, S., Yan, Q. and Suzuki, S. T. (1999). Expression of a novel protocadherin, OL-protocadherin, in a subset of functional systems of the developing mouse brain. *J. Neurosci.* **19**, 995–1005.
- Homayouni, R., Rice, D. S. and Curran, T. (2001). Disabled-1 interacts with a novel developmentally regulated protocadherin. *Biochem. Biophys. Res. Commun.* **289**, 539–547.
- Hoshina, N., Tanimura, A., Yamasaki, M., Inoue, T., Fukabori, R., Kuroda, T., Yokoyama, K., Tezuka, T., Sagara, H., Hirano, S. et al. (2013). Protocadherin 17 regulates presynaptic assembly in topographic corticobasal Ganglia circuits. *Neuron* **78**, 839–854.
- Hulpiau, P. and van Roy, F. (2009). Molecular evolution of the cadherin superfamily. *Int. J. Biochem. Cell Biol.* **41**, 349–369.
- Kai, M., Ueno, N. and Kinoshita, N. (2015). Phosphorylation-dependent ubiquitination of paraxial protocadherin (PAPC) controls gastrulation cell movements. *PLoS ONE* **10**, e0115111.
- Kaneko, R., Kato, H., Kawamura, Y., Esumi, S., Hirayama, T., Hirabayashi, T. and Yagi, T. (2006). Allelic gene regulation of Pcdh-alpha and Pcdh-gamma clusters involving both monoallelic and biallelic expression in single Purkinje cells. *J. Biol. Chem.* **281**, 30551–30560.
- Kietzmann, A., Wang, Y., Weber, D. and Steinbeisser, H. (2012). *Xenopus* paraxial protocadherin inhibits Wnt/ $\beta$ -catenin signalling via casein kinase 2 $\beta$ . *EMBO Rep.* **13**, 129–134.
- Kim, S. H., Yamamoto, A., Bouwmeester, T., Agius, E. and Robertis, E. M. (1998). The role of paraxial protocadherin in selective adhesion and cell movements of the mesoderm during *Xenopus* gastrulation. *Development* **125**, 4681–4690.
- Kim, S. Y., Chung, H. S., Sun, W. and Kim, H. (2007). Spatiotemporal expression pattern of non-clustered protocadherin family members in the developing rat brain. *Neuroscience* **147**, 996–1021.
- Kim, S. Y., Mo, J. W., Han, S., Choi, S. Y., Han, S. B., Moon, B. H., Rhyu, I. J., Sun, W. and Kim, H. (2010). The expression of non-clustered protocadherins in adult rat hippocampal formation and the connecting brain regions. *Neuroscience* **170**, 189–199.
- Kim, S. Y., Yasuda, S., Tanaka, H., Yamagata, K. and Kim, H. (2011). Non-clustered protocadherin. *Cell Adh. Migr.* **5**, 97–105.
- Kraft, B., Berger, C. D., Wallkamm, V., Steinbeisser, H. and Wedlich, D. (2012). Wnt-11 and Fz7 reduce cell adhesion in convergent extension by sequestration of PAPC and C-cadherin. *J. Cell Biol.* **198**, 695–709.
- Krause, M. and Gautreau, A. (2014). Steering cell migration: lamellipodium dynamics and the regulation of directional persistence. *Nat. Rev. Mol. Cell Biol.* **15**, 577–590.
- Krause, M., Leslie, J. D., Stewart, M., Lafuente, E. M., Valderrama, F., Jagannathan, R., Strasser, G. A., Rubinson, D. A., Liu, H., Way, M. et al. (2004). Lamellipodin, an Ena/VASP ligand, is implicated in the regulation of lamellipodial dynamics. *Dev. Cell* **7**, 571–583.
- Krishna, K., Hertel, N. and Redies, C. (2011). Cadherin expression in the somatosensory cortex: evidence for a combinatorial molecular code at the single-cell level. *Neuroscience* **175**, 37–48.
- Law, A. L., Vehlow, A., Kotini, M., Dodgson, L., Soong, D., Theveneau, E., Bodo, C., Taylor, E., Navarro, C., Perera, U. et al. (2013). Lamellipodin and the Scar/WAVE complex cooperate to promote cell migration in vivo. *J. Cell Biol.* **203**, 673–689.
- Lefebvre, J. L., Zhang, Y., Meister, M., Wang, X. and Sanes, J. R. (2008). gamma-Protocadherins regulate neuronal survival but are dispensable for circuit formation in retina. *Development* **135**, 4141–4151.
- Lefebvre, J. L., Kostadinov, D., Chen, W. V., Maniatis, T. and Sanes, J. R. (2012). Protocadherins mediate dendritic self-avoidance in the mammalian nervous system. *Nature* **488**, 517–521.
- Leung, L. C., Urbančić, V., Baudet, M. L., Dwivedy, A., Bayley, T. G., Lee, A. C., Harris, W. A. and Holt, C. E. (2013). Coupling of NF-protocadherin signaling to axon guidance by cue-induced translation. *Nat. Neurosci.* **16**, 166–173.
- Nakao, S., Platek, A., Hirano, S. and Takeichi, M. (2008). Contact-dependent promotion of cell migration by the OL-protocadherin-Nap1 interaction. *J. Cell Biol.* **182**, 395–410.
- Piper, M., Dwivedy, A., Leung, L., Bradley, R. S. and Holt, C. E. (2008). NF-protocadherin and TAF1 regulate retinal axon initiation and elongation in vivo. *J. Neurosci.* **28**, 100–105.
- Rashid, D., Newell, K., Shama, L. and Bradley, R. (2006). A requirement for NF-protocadherin and TAF1/Set in cell adhesion and neural tube formation. *Dev. Biol.* **291**, 170–181.
- Redies, C., Vanhalst, K. and Roy, F. (2005). delta-Protocadherins: unique structures and functions. *Cell. Mol. Life Sci.* **62**, 2840–2852.
- Sano, K., Tanihara, H., Heimark, R. L., Obata, S., Davidson, M., St John, T., Taketani, S. and Suzuki, S. (1993). Protocadherins: a large family of cadherin-related molecules in central nervous system. *EMBO J.* **12**, 2249–2256.
- Schreiner, D. and Weiner, J. A. (2010). Combinatorial homophilic interaction between gamma-protocadherin multimers greatly expands the molecular diversity of cell adhesion. *Proc. Natl. Acad. Sci. USA* **107**, 14893–14898.
- Suo, L., Lu, H., Ying, G., Capocchi, M. R. and Wu, Q. (2012). Protocadherin clusters and cell adhesion kinase regulate dendrite complexity through Rho GTPase. *J. Mol. Cell Biol.* **4**, 362–376.
- Suzuki, S. T. (1996). Protocadherins and diversity of the cadherin superfamily. *J. Cell Sci.* **109**, 2609–2611.
- Tai, K., Kubota, M., Shiono, K., Tokutsu, H. and Suzuki, S. T. (2010). Adhesion properties and retinofugal expression of chicken protocadherin-19. *Brain Res.* **1344**, 13–24.
- Takeichi, M. (2014). Dynamic contacts: rearranging adherens junctions to drive epithelial remodeling. *Nat. Rev. Mol. Cell Biol.* **15**, 397–410.
- Takeichi, M. and Abe, K. (2005). Synaptic contact dynamics controlled by cadherin and catenins. *Trends Cell Biol.* **15**, 216–221.
- Theveneau, E., Marchant, L., Kuriyama, S., Gull, M., Moepps, B., Parsons, M. and Mayor, R. (2010). Collective chemotaxis requires contact-dependent cell polarity. *Dev. Cell* **19**, 39–53.
- Thu, C. A., Chen, W. V., Rubinstein, R., Chevee, M., Wolcott, H. N., Felsovalyi, K. O., Tapia, J. C., Shapiro, L., Honig, B. and Maniatis, T. (2014). Single-cell identity generated by combinatorial homophilic interactions between  $\alpha$ ,  $\beta$ , and  $\gamma$  protocadherins. *Cell* **158**, 1045–1059.
- Tsai, N. P., Wilkerson, J. R., Guo, W., Maksimova, M. A., DeMartino, G. N., Cowan, C. W. and Huber, K. M. (2012). Multiple autism-linked genes mediate synapse elimination via proteasomal degradation of a synaptic scaffold PSD-95. *Cell* **151**, 1581–1594.
- Tsukasaki, Y., Miyazaki, N., Matsumoto, A., Nagae, S., Yonemura, S., Tanoue, T., Iwasaki, K. and Takeichi, M. (2014). Giant cadherins Fat and Dachsous self-bend to organize properly spaced intercellular junctions. *Proc. Natl. Acad. Sci. USA* **111**, 16011–16016.
- Uemura, M., Nakao, S., Suzuki, S. T., Takeichi, M. and Hirano, S. (2007). OL-Protocadherin is essential for growth of striatal axons and thalamocortical projections. *Nat. Neurosci.* **10**, 1151–1159.
- van Roy, F. (2014). Beyond E-cadherin: roles of other cadherin superfamily members in cancer. *Nat. Rev. Cancer* **14**, 121–134.
- Wang, X., Weiner, J. A., Levi, S., Craig, A. M., Bradley, A. and Sanes, J. R. (2002). Gamma protocadherins are required for survival of spinal interneurons. *Neuron* **36**, 843–854.
- Wang, Y., Janicki, P., Köster, I., Berger, C. D., Wenzl, C., Grosshans, J. and Steinbeisser, H. (2008). *Xenopus* Paraxial Protocadherin regulates morphogenesis by antagonizing Sprouty. *Genes Dev.* **22**, 878–883.
- Wu, Q. and Maniatis, T. (1999). A striking organization of a large family of human neural cadherin-like cell adhesion genes. *Cell* **97**, 779–790.
- Yagi, T. (2012). Molecular codes for neuronal individuality and cell assembly in the brain. *Front. Mol. Neurosci.* **5**, 45.

- Yamagata, K., Andreasson, K. I., Sugiura, H., Maru, E., Dominique, M., Irie, Y., Miki, N., Hayashi, Y., Yoshioka, M., Kaneko, K. et al.** (1999). Arcadlin is a neural activity-regulated cadherin involved in long term potentiation. *J. Biol. Chem.* **274**, 19473–19479.
- Yamamoto, A., Kemp, C., Bachiller, D., Geissert, D. and De Robertis, E. M.** (2000). Mouse paraxial protocadherin is expressed in trunk mesoderm and is not essential for mouse development. *Genesis* **27**, 49–57.
- Yasuda, S., Tanaka, H., Sugiura, H., Okamura, K., Sakaguchi, T., Tran, U., Takemiya, T., Mizoguchi, A., Yagita, Y., Sakurai, T. et al.** (2007). Activity-induced protocadherin arcadlin regulates dendritic spine number by triggering N-cadherin endocytosis via TAO2beta and p38 MAP kinases. *Neuron* **56**, 456–471.
- Yoder, M. D. and Gumbiner, B. M.** (2011). Axial protocadherin (AXPC) regulates cell fate during notochordal morphogenesis. *Dev. Dyn.* **240**, 2495–2504.
- Yu, J. S., Koujak, S., Nagase, S., Li, C. M., Su, T., Wang, X., Keniry, M., Memeo, L., Rojzman, A., Mansukhani, M. et al.** (2008). PCDH8, the human homolog of PAPC, is a candidate tumor suppressor of breast cancer. *Oncogene* **27**, 4657–4665.
